# Ratio of Waist-to-Calf Circumference and Carotid Atherosclerosis in Korean Patients With Type 2 Diabetes

SOO-KYUNG KIM, MD, PHD<sup>1</sup>  
YOUNG JU CHOI, MD, PHD<sup>2</sup>  
BYUNG WOOK HUH, MD<sup>2</sup>  
CHUL-SIK KIM, MD, PHD<sup>3</sup>

SEOK WON PARK, MD, PHD<sup>1</sup>  
EUN JIG LEE, MD, PHD<sup>4</sup>  
YONG-WOOK CHO, MD, PHD<sup>1</sup>  
KAP BUM HUH, MD, PHD<sup>2</sup>

**OBJECTIVE**—To investigate whether waist circumference (WC), calf circumference (CC), and waist-to-calf ratio (WCR) are associated with carotid atherosclerosis in patients with type 2 diabetes.

**RESEARCH DESIGN AND METHODS**—This was an observational study performed in 3,694 Korean patients with type 2 diabetes. Anthropometric measures and carotid ultrasound were performed on each subject. Carotid atherosclerosis was defined as having a clearly isolated focal plaque or mean carotid intima-media thickness (CMT)  $\geq 1.1$  mm.

**RESULTS**—CMT and the frequency of carotid atherosclerosis were higher with increasing WC quartiles and decreasing CC quartiles. There was an augmentative effect of CC and WC on the frequency of carotid atherosclerosis, which was dramatically higher in both the highest WC quartile and lowest CC quartile. However, except for the relationship between the quartile of CC with the frequency of carotid atherosclerosis in men, those associations disappeared after adjusting for potential confounders. In contrast, WCR was significantly related to CMT (only in women) and carotid atherosclerosis, even after adjustment (adjusted odds ratio for carotid atherosclerosis for the highest quartile of WCR compared with the lowest quartile being 1.178 [95% CI 1.026–1.353] and 1.276 [1.053–1.545] in men and women, respectively).

**CONCLUSIONS**—A low CC and high WC seems to be associated with a carotid atherosclerotic burden in Korean diabetic patients. In particular, compared with each circumference, WCR is independently associated with carotid atherosclerosis. However, the cross-sectional nature of the study limits conclusions regarding the direction or causality. Further longitudinal study is warranted in this and other ethnic groups.

*Diabetes Care* 34:2067–2071, 2011

Obesity is an important risk factor for a broad spectrum of cardiometabolic disturbance, including hypertension, dyslipidemia, glucose intolerance, and even cardiovascular disease. In particular, abdominal obesity is more closely associated with risk of disease than general obesity. Waist circumference (WC) or waist-to-hip ratio (WHR), as indicators of abdominal obesity, may be better predictors of the risk of disease than the BMI,

an indicator of general obesity (1,2). In contrast, leg muscle mass and peripheral adiposity might offer protection from cardiometabolic diseases. Larger hip or thigh circumferences seem to be associated with a lower risk of type 2 diabetes and a decreased risk of developing coronary artery disease and premature death (3–5). Recent evidence that calf circumference (CC) is also associated with mortality or cardiovascular risk is growing (6–8).

Considering that the effects of abdominal fat and leg lean mass on the risk of diseases are diametrically opposed, indices that assess both masses simultaneously may be better at evaluating the risk for cardiometabolic disease compared with indices that separately estimate either abdominal fat or leg lean mass. In that sense, the WHR or waist-to-thigh ratio (WTR) may be better than other simple anthropometric indices, and some studies have suggested that both indices are more sensitive than WC at estimating cardiometabolic risk (9–11). However, it is not practical to use those two indices in a busy clinical practice. In particular, the WHR may mask the accumulation of abdominal fat if the hip circumference is also increased (12).

In this study, we measured WC and CC to evaluate abdominal fat and leg lean mass and used the waist-to-calf ratio (WCR) as an index to assess the disproportion between abdominal fat and leg muscle mass. The aim of the current study was to investigate whether WC, CC, and WCR are associated with carotid atherosclerosis in a large cohort of patients with type 2 diabetes.

## RESEARCH DESIGN AND METHODS

As a part of the Seoul Metabolic Syndrome cohort, 9,532 diabetic patients were consecutively enrolled at the Huh's Diabetes Center in Seoul, Korea. We included the 2,116 men and 1,578 women who had no antidiabetic acid decarboxylase antibody and whose fasting C-peptide was  $>0.23$  mmol/L, gave complete information on all covariates, and underwent both a short insulin tolerance test (SITT) and a carotid ultrasound. The positivity for antidiabetic acid decarboxylase antibody and low fasting C-peptide level might mean type 1 diabetes rather than type 2 diabetes. All participants signed consent forms, and the ethics committee of the Yonsei University College of Medicine approved the study.

Weight and height were measured for all subjects while they were wearing light clothing and not wearing shoes. WC was measured at the midpoint between the

From the <sup>1</sup>Department of Internal Medicine, CHA Bundang Medical Center, CHA University, Seongnam, Korea; the <sup>2</sup>Huh's Diabetes Center and the 21st Century Diabetes and Vascular Research Institute, Seoul, Korea; the <sup>3</sup>Department of Internal Medicine, Hallym University Sacred Heart Hospital, Anyang, Korea; and the <sup>4</sup>Department of Internal Medicine, Yonsei University College of Medicine, Seoul, Korea.

Corresponding author: Seok Won Park, spark@cha.ac.kr.

Received 19 April 2011 and accepted 5 June 2011.

DOI: 10.2337/dc11-0743

This article contains Supplementary Data online at <http://care.diabetesjournals.org/lookup/suppl/doi:10.2337/dc11-0743/-DC1>.

© 2011 by the American Diabetes Association. Readers may use this article as long as the work is properly cited, the use is educational and not for profit, and the work is not altered. See <http://creativecommons.org/licenses/by-nc-nd/3.0/> for details.

lower ribs and the iliac crest at the end of normal expiration. CC was measured at the point of the largest circumference of the calf. WCR was calculated as the ratio of the WC and CC. All the participants underwent measurements for fasting plasma glucose, HbA<sub>1c</sub>, C-peptide, insulin, total cholesterol, LDL cholesterol, HDL cholesterol, and triglyceride and completed a questionnaire concerning smoking and drinking status and cardiovascular or other diseases.

Metabolic syndrome was defined according to the National Cholesterol Education Program Adult Treatment Panel III, with a modification for the cutoff of WC (13). Individuals having three or more of the following criteria were defined as having metabolic syndrome: 1) abdominal obesity by WC (>90 cm in men; >80 cm in women), 2) elevated fasting blood glucose ( $\geq 5.6$  mmol/L), 3) high blood pressure ( $\geq 130/85$  mmHg) or the use of antihypertensive medications, 4) hypertriglyceridemia ( $\geq 1.69$  mmol/L) or specific treatment for lipid abnormality, and 5) low HDL cholesterol (<1.04 mmol/L in men; <1.29 mmol/L in women). All patients in the current study were defined to fulfill the criterion for hyperglycemia. Vascular disease was defined as having a history of stroke, including transient ischemic attack, or coronary artery disease, such as angina and myocardial infarction, or peripheral arterial disease.

## SITT

Insulin sensitivity was assessed by SITT as a rate constant for plasma glucose disappearance (*Kitt*: %/min) (14). Briefly, the SITT was carried out at 8:00 A.M. after an overnight fast. Venous blood samples were collected at 0, 3, 6, 9, 12, and 15 min after an intravenous bolus injection of prediluted regular insulin (Humulin, Eli Lilly, Indianapolis, IN) at a dose of 0.1 units/kg. Plasma glucose concentrations were determined immediately after sampling using Beckman glucose analyzer II (Beckman Instruments, Fullerton, CA), and then the *Kitt* was calculated from the slope of the fall in log-transformed plasma glucose between 3 and 15 min. Immediately after the test, 100 mL of 20% dextrose solution was administered intravenously to avoid potential hypoglycemia.

## Carotid ultrasound

The bilateral common carotid arteries were scanned using a high-resolution ultrasonographic system (LOGIQ 7, GE,

Milwaukee, WI) with a 10 MHz linear transducer. Scanning was performed at the mid and distal common carotid artery by a lateral longitudinal projection. The carotid intima-media thickness (CIMT) was measured at three points on the far wall of the mid and distal common carotid artery, 1 cm proximal to the dilatation of the carotid bulb, and the mean value of six measurements from the right and left common carotid arteries were used. The CIMT was defined as the distance between the media-adventitia interface and the lumen-intima interface. Carotid plaque was defined as a distinct area of hyperechogenicity and/or protrusion into the lumen of the vessel with at least 50% greater thickness than the surrounding area. Carotid atherosclerosis was defined as having a focal plaque or diffuse thickening of the carotid wall (CIMT  $\geq 1.1$  mm).

## Statistical analysis

Continuous variables were reported as mean  $\pm$  SD, and categorical factors were reported as percentages. All the continuous variables were normally distributed with homogenous variances between groups except for triglyceride, which was log transformed before entering into the model. Quartiles of various anthropometric indices (WC, CC, or WCR) were determined after stratifying by sex. The intergroup comparisons were performed using a one-way ANOVA test followed by a Scheffé post hoc test. In particular, comparisons of the prevalence of carotid atherosclerosis were made by means of a  $\chi^2$  test. To estimate the odds ratio (OR) of carotid atherosclerosis in each quartile, logistic regression was performed, and the lowest quartile was used as the reference category. Multivariate-adjusted OR was presented with 95% CIs. For comparisons of CIMT, ANOVA and ANCOVA were used. Three models examining the association of anthropometric indices and CIMT and carotid atherosclerosis were used under different adjustment schemes. The first model adjusted only age. The second model additionally adjusted for duration of diabetes, smoking status, history of vascular diseases, hypoglycemic agents (insulin, sulfonylureas, metformin,  $\alpha$ -glucosidase inhibitors, and thiazolidinediones), antihypertensive treatments (calcium channel blocker, angiotensin receptor blocker, ACE inhibitor, and  $\beta$ -blocker), lipid-lowering agents (statin and fenofibrate), systolic blood pressure, *Kitt*, HDL cholesterol, LDL cholesterol,

and log-transformed triglyceride. The third model additionally adjusted for BMI.  $P < 0.05$  was considered significant. All statistical analyses were performed using IBM SPSS Statistics (version 19.0; IBM Co., Somers, NY).

**RESULTS**—Baseline characteristics are shown in Table 1. The mean age was  $56.5 \pm 10.5$  years, and 57.3% of the participants were men. The mean duration of type 2 diabetes was  $8.04 \pm 7.35$  years. Among all participants, 1.1 and 18.3% had a history of vascular disease and carotid atherosclerosis, respectively. In both sexes, participants with a higher quartile of WCR, as compared with those who had a lower quartile of WCR, were older and more obese (both generally and centrally), had longer duration of diabetes, needed more medications (except sulfonylurea in women), had a lower insulin sensitivity (*Kitt*), and were likely to have more adverse metabolic profiles (Supplementary Table 1).

Either the highest quartile of WC or the lowest quartile of CC was associated with the higher frequency of carotid atherosclerosis compared with the lowest quartile of WC or the highest quartile of CC in both sexes (Fig. 1). It is interesting that there was an opposite but augmentative association of CC and WC with carotid atherosclerosis, which was 0.0 and 5.3% in men and women, respectively, in the highest calf quartile and the lowest waist quartile, against 42.9 and 30.0% in the lowest calf quartile and the highest waist quartile.

In both unadjusted and age-adjusted models, there were significant linear associations of the WCR with the CIMT and the frequency of carotid atherosclerosis, with the lowest at a bottom quartile of the WCR (Table 2). After further multivariable adjustments for age, BMI, duration of diabetes, smoking status, history of vascular diseases, hypoglycemic agents, antihypertensive treatments, lipid-lowering agents, systolic blood pressure, *Kitt*, HDL cholesterol, LDL cholesterol, and log-transformed triglyceride, the association of the WCR quartiles with the CIMT remained significant only in women, but the relationship with carotid atherosclerosis remained significant in both sexes. Men and women in the highest quartile of the WCR were 1.178 times (95% CI 1.026–1.353) and 1.276 times (1.053–1.545), respectively, more likely to have carotid atherosclerosis than those in the lowest quartile.

Table 1—Clinical characteristics of subjects

|                                  | Total        | Men          | Women        |
|----------------------------------|--------------|--------------|--------------|
| <i>n</i>                         | 3,694        | 2,116        | 1,578        |
| Age (years)                      | 56.6 ± 10.5  | 55.1 ± 10.9  | 58.6 ± 9.4   |
| Duration of diabetes (years)     | 8.04 ± 7.35  | 7.89 ± 7.54  | 8.25 ± 7.08  |
| Antihyperglycemic agents (%)     |              |              |              |
| Sulfonylureas                    | 54.4         | 52.6         | 56.7         |
| Metformin                        | 40.0         | 37.7         | 43.0         |
| $\alpha$ -Glucosidase inhibitors | 11.6         | 11.8         | 11.3         |
| Thiazolidinediones               | 10.2         | 9.9          | 10.5         |
| Insulin                          | 12.3         | 10.3         | 15.0         |
| Hypertension (%)                 | 73.3         | 72.5         | 74.3         |
| Antihypertensive treatment (%)   | 30.8         | 27.7         | 35.0         |
| Dyslipidemia (%)                 | 59.4         | 54.7         | 65.5         |
| Lipid-lowering treatment (%)     | 19.5         | 16.6         | 23.4         |
| Active smoker (%)                | 19.9         | 33.1         | 2.2          |
| Metabolic syndrome (%)           | 59.8         | 55.9         | 65.0         |
| History of vascular disease (%)  | 1.1          | 1.2          | 0.8          |
| BMI (kg/m <sup>2</sup> )         | 24.5 ± 3.2   | 24.6 ± 3.0   | 24.4 ± 3.4   |
| WC (cm)                          | 83.5 ± 8.5   | 85.9 ± 8.0   | 80.4 ± 8.3   |
| CC (cm)                          | 34.7 ± 3.1   | 35.8 ± 2.9   | 33.2 ± 2.7   |
| Systolic blood pressure (mmHg)   | 134.5 ± 18.1 | 132.6 ± 17.2 | 136.9 ± 18.9 |
| Diastolic blood pressure (mmHg)  | 85.5 ± 11.4  | 86.3 ± 11.4  | 84.4 ± 11.3  |
| Kitt (%/min)                     | 2.04 ± 0.95  | 2.04 ± 0.96  | 2.04 ± 0.96  |
| Glucose (mmol/L)                 | 8.60 ± 3.21  | 8.71 ± 3.22  | 8.44 ± 3.20  |
| HbA <sub>1c</sub> (%)            | 8.24 ± 1.91  | 8.27 ± 1.97  | 8.20 ± 1.81  |
| C-peptide (mmol/L)               | 0.66 ± 0.31  | 0.67 ± 0.30  | 0.65 ± 0.32  |
| Total cholesterol (mmol/L)       | 4.98 ± 1.01  | 4.86 ± 0.98  | 5.15 ± 1.02  |
| Triglyceride (mmol/L)            | 1.58 ± 0.86  | 1.59 ± 0.88  | 1.56 ± 0.82  |
| HDL cholesterol (mmol/L)         | 1.30 ± 0.35  | 1.25 ± 0.33  | 1.38 ± 0.35  |
| LDL cholesterol (mmol/L)         | 2.95 ± 0.88  | 2.89 ± 0.85  | 3.06 ± 0.90  |
| CIMT (mm)                        | 0.85 ± 0.18  | 0.86 ± 0.19  | 0.83 ± 0.17  |
| Carotid atherosclerosis (%)      | 18.3         | 21.2         | 14.4         |

Data are means ± SD or %.

In contrast, quartiles of WC were associated with increasing CIMT, but not with the frequency of carotid atherosclerosis, in both sexes (Supplementary Table 2). There were significant trends with greater CIMT and higher frequency of carotid atherosclerosis associated with decreasing CC quartile in both sexes (Supplementary Table 3). With multivariable adjustments, however, only the association of quartiles of CC with carotid atherosclerosis in men remained significant.

**CONCLUSIONS**—It is well known that abdominal fat is a causal factor of cardiometabolic diseases, whereas muscle mass plays a protective role in those diseases (1–5). Muscle mass is gradually decreased with age, even if body weight or body fat mass is unchanged or slightly increased. That phenomenon, so-called sarcopenia or sarcopenic obesity, is frequently observed in the elderly as well as young or middle-aged adults

with chronic disease. Subjects with a particular phenotype may be more prone to developing metabolic and cardiovascular diseases than those with the opposite phenotype or those with high abdominal fat mass alone (15,16). Therefore, both body fat (especially abdominal) and muscle mass need to be considered when assessing the risk for those diseases. The current study compared WC, CC, and WCR to carotid atherosclerotic burden. We demonstrated that CC was negatively and WC was positively associated with carotid atherosclerotic burden. Furthermore, the WCR had the strongest association with carotid atherosclerosis compared with each circumference, and that association was independent of multiple potential confounders.

Computed tomography and magnetic resonance imaging have been considered to be the gold standards for assessing visceral fat and skeletal muscle distributions. Previous studies reported that the

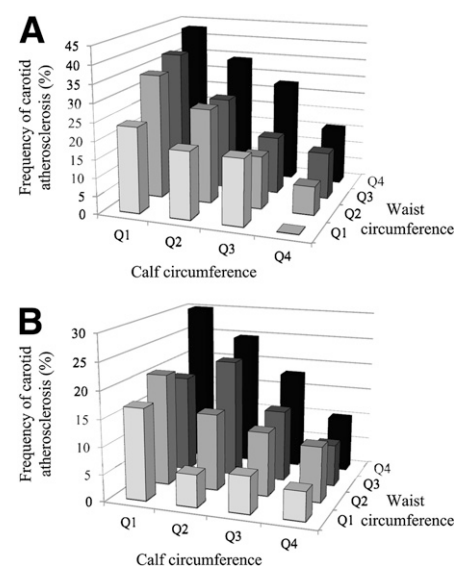

**Figure 1**—Multiplicative effect of CC and WC on the frequency of carotid atherosclerosis in men (A) and women (B). Q, quartile.

ratio of visceral fat to thigh muscle area is a good parameter that reflects insulin resistance and is an indicator for the risk of metabolic syndrome (17,18). However, the clinical application of those imaging devices is limited because of the time required, cost, accessibility, and risk of radiation exposure. The simplest and most widely used method for assessing visceral fat accumulation and assuming the disproportion between abdominal fat and lean mass is measuring WC and WHR, which are well known as anthropometric parameters to reflect cardiovascular risks (1,2,19,20). However, recent studies demonstrate that measuring WC alone may be insufficient to assess the visceral fat amount or predict the cardiometabolic risk (21). Indeed, even subjects with a normal WC are more prone to having carotid atherosclerosis if they have centrally located body fat (22). Also, in the case of WHR, there are a number of problems inherent in the use of a ratio indicator. Because of the equation used to determine that value, both lean and massively obese individuals may end up having the same WHR.

WTR has been proposed as an new alternative index for abdominal obesity and is more strongly associated with cardiovascular and metabolic risk factors than WHR (11,23). However, thigh circumference, a component of WTR, may also be as confounded anatomically as hip circumference. Two different anatomical landmarks have been used to determine the exact location for measuring

Table 2—Association of CIMT and carotid atherosclerosis with quartiles of WCR

|                         | Q1            | Q2                  | Q3                  | Q4                  | P for trend |
|-------------------------|---------------|---------------------|---------------------|---------------------|-------------|
| Men                     |               |                     |                     |                     |             |
| n                       | 520           | 534                 | 536                 | 526                 |             |
| CIMT (mean ± SE)        |               |                     |                     |                     |             |
| Unadjusted (mm)         | 0.796 ± 0.007 | 0.852 ± 0.008*      | 0.878 ± 0.008*      | 0.921 ± 0.008*†‡    | <0.001      |
| Adjusted (mm)§          | 0.838 ± 0.008 | 0.863 ± 0.007*      | 0.871 ± 0.007*      | 0.875 ± 0.008*      | 0.002       |
| Adjusted (mm)           | 0.847 ± 0.008 | 0.865 ± 0.007       | 0.869 ± 0.007*      | 0.865 ± 0.008       | 0.182       |
| Adjusted (mm)¶          | 0.849 ± 0.008 | 0.865 ± 0.007       | 0.869 ± 0.007       | 0.863 ± 0.008       | 0.295       |
| Carotid atherosclerosis |               |                     |                     |                     |             |
| Unadjusted (%)          | 12.3          | 18.4*               | 22.2*               | 31.9*†‡             | <0.001      |
| Adjusted OR (95% CI)§   | 1.000         | 1.240 (0.863–1.782) | 1.217 (1.023–1.448) | 1.194 (1.061–1.344) | 0.002       |
| Adjusted OR (95% CI)    | 1.000         | 1.144 (0.773–1.691) | 1.135 (0.940–1.371) | 1.137 (0.994–1.300) | 0.082       |
| Adjusted OR (95% CI)¶   | 1.000         | 1.181 (0.795–1.753) | 1.146 (0.945–1.388) | 1.178 (1.026–1.353) | 0.028       |
| Women                   |               |                     |                     |                     |             |
| n                       | 393           | 398                 | 390                 | 397                 |             |
| CIMT (mean ± SE)        |               |                     |                     |                     |             |
| Unadjusted (mm)         | 0.768 ± 0.008 | 0.823 ± 0.008*      | 0.845 ± 0.009*      | 0.886 ± 0.008*†‡    | <0.001      |
| Adjusted (mm)§          | 0.803 ± 0.008 | 0.827 ± 0.008       | 0.841 ± 0.008*      | 0.852 ± 0.008*†     | <0.001      |
| Adjusted (mm)           | 0.812 ± 0.008 | 0.826 ± 0.008       | 0.841 ± 0.008*      | 0.844 ± 0.008*      | 0.037       |
| Adjusted (mm)¶          | 0.811 ± 0.009 | 0.826 ± 0.008       | 0.841 ± 0.008*      | 0.844 ± 0.008*      | 0.045       |
| Carotid atherosclerosis |               |                     |                     |                     |             |
| Unadjusted (%)          | 7.9           | 12.3*               | 17.4*†              | 20.2*†              | <0.001      |
| Adjusted OR (95% CI)§   | 1.000         | 1.378 (0.848–2.237) | 1.352 (1.070–1.709) | 1.267 (1.078–1.489) | 0.002       |
| Adjusted OR (95% CI)    | 1.000         | 1.135 (0.675–1.908) | 1.300 (1.006–1.681) | 1.198 (1.002–1.433) | 0.048       |
| Adjusted OR (95% CI)¶   | 1.000         | 1.251 (0.729–2.147) | 1.433 (1.090–1.884) | 1.276 (1.053–1.545) | 0.003       |

Q, quartile. Q1 was the lowest quartile. \* $P < 0.05$  vs. Q1, † $P < 0.05$  vs. Q2, ‡ $P < 0.05$  vs. Q3. §Adjusted for age. ||Like § and additionally adjusted for duration of diabetes, smoking status, history of vascular diseases, hypoglycemic agents (insulin, sulfonylurea, metformin,  $\alpha$ -glucosidase inhibitors, and thiazolidinediones), antihypertensive treatments (calcium channel blocker, angiotensin receptor blocker, ACE inhibitor, and  $\beta$ -blocker), lipid-lowering drugs (statin and fenofibrate), systolic blood pressure, *Kitt*, HDL cholesterol, LDL cholesterol, and triglyceride (log transformed). ¶Like || and additionally adjusted for BMI.

thigh circumference, directly below the gluteal fold and at the midthigh (4,10). Wherever measured, there are substantial errors in every measurement. Moreover, thigh circumference is not convenient to measure in practice because of disrobing and, in particular, measurement of proximal thigh circumference may be uncomfortable for some individuals. In contrast, the measure of CC has several advantages over thigh circumference. It requires only rolling the pants up to the knees. It is more culturally acceptable in many cases and less susceptible to measurement and calculation errors than a measure of thigh circumference. Also, CC is a potential marker of leg muscle mass (24). For this reason, we selected CC as an anthropometric index representing leg lean mass and WCR as an index for assessing the disproportion between abdominal fat and leg muscle mass. Of course, WCR might also be susceptible to measurement and calculation errors by requiring the ratio of two measures as opposed to a single measurement. However, simultaneously measuring both WC and CC could provide more specific information for sarcopenic phenotype compared with either a WC

or CC measurement. In our study, WCR had a better correlation with CIMT than WC or CC ( $r = 0.242$ ,  $P < 0.001$  vs.  $r = 0.079$ ,  $P < 0.001$  or  $r = -0.143$ ,  $P < 0.001$  in men;  $r = 0.255$ ,  $P < 0.001$  vs.  $r = 0.144$ ,  $P < 0.001$  or  $r = -0.111$ ,  $P < 0.001$  in women, respectively).

Our analysis demonstrated an opposite and multiplicative relationship of WC and CC with the frequency of carotid atherosclerosis in both sexes, the highest frequency being found in subjects with the highest quartile of WC and the lowest quartile of CC. The independent association with carotid atherosclerosis across quartiles of each index was observed only in the WCR in both sexes and in CC in men. The CIMT was larger with increasing WCR and WC and decreasing CC in both sexes, but except for WCR in women, the association disappeared after adjusting for multiple confounders. The associations with CIMT and atherosclerosis across WHR quartiles were not observed in both sexes, and in the case of WTR, the odds of carotid atherosclerosis across WTR quartiles were lower than WCR quartiles (data not shown). This indicates that WCR may be a better indicator for carotid

atherosclerotic burden than other anthropometric indices.

Several limitations of this study should be noted. First, the cross-sectional study design limited conclusions regarding the direction or causality between the anthropometric indices and cardiometabolic risk. Second, our study showed an independent association of WCR with carotid atherosclerosis but did not observe the cardiovascular events and mortality. Also, we could not investigate a degree of physical activity, which could largely affect leg lean mass. Third, the contribution of fat or lean mass distribution to metabolic and cardiovascular diseases may vary among different populations. Accordingly, our results may differ from those in other ethnic groups. Fourth, we did not suggest a definite cutoff value of WCR or CC to screen subjects at higher risk for carotid atherosclerosis. Finally, CC is a surrogate marker of lean mass or peripheral subcutaneous fat. We cannot understand whether the inverse association between carotid atherosclerosis and increasing CC or decreasing WCR is due to a protective effect of either a large amount of lean mass or peripheral subcutaneous fat or both. Thus,

it may warrant further investigation using a longitudinal study design and implementing computed tomography or magnetic resonance imaging to measure the muscle and fat distribution within the calf separately.

This study also has several strengths. This study was performed using a relatively large cohort of type 2 diabetes performed in one institute. In particular, carotid Doppler was performed, and all data collection procedures including anthropometric indices were obtained by one trained study staff. This is the first study investigating the association of WCR, a relatively new measure of abdominal adiposity, and carotid atherosclerosis. It also adds to the growing discussion with regards to the characterization of high-risk phenotypes and the value of anthropometric measurements for clinical risk stratification.

The results of our study suggest that WCR may be superior to each single measure of WC or CC in association with prevalent carotid atherosclerosis. It is speculated that putting on abdominal fat and losing leg muscle might act synergistically, causing carotid atherosclerosis. WCR may be a useful and practical anthropometric index that facilitates the early identification of diabetic subjects with high risk for cardiovascular disease.

**Acknowledgments**—No potential conflicts of interest relevant to this article were reported.

S.-K.K. performed the study design and statistical analysis and wrote the manuscript. Y.J.C. and B.W.H. performed data collection and researched data. C.-S.K. reviewed the manuscript. S.W.P. contributed to the design, performed statistical analysis, and edited the manuscript. E.J.L. and Y.-W.C. provided significant expertise and reviewed the manuscript. K.B.H. provided the conception for the study, contributed to the conduct of the study, and critically reviewed the manuscript.

Parts of this study were presented in abstract form at the 70th Scientific Sessions of the American Diabetes Association, Orlando, Florida, 25–29 June 2010.

## References

1. Yusuf S, Hawken S, Ounpuu S, et al.; INTERHEART Study Investigators. Obesity and the risk of myocardial infarction in 27,000 participants from 52 countries: a case-control study. *Lancet* 2005;366:1640–1649
2. Pischon T, Boeing H, Hoffmann K, et al. General and abdominal adiposity and risk of death in Europe. *N Engl J Med* 2008;359:2105–2120
3. Tankó LB, Bagger YZ, Alexandersen P, Larsen PJ, Christiansen C. Peripheral adiposity exhibits an independent dominant antiatherogenic effect in elderly women. *Circulation* 2003;107:1626–1631
4. Heitmann BL, Frederiksen P. Thigh circumference and risk of heart disease and premature death: prospective cohort study. *BMJ* 2009;339:b3292
5. Snijder MB, Dekker JM, Visser M, et al. Associations of hip and thigh circumferences independent of waist circumference with the incidence of type 2 diabetes: the Hoorn Study. *Am J Clin Nutr* 2003;77:1192–1197
6. Tsai AC, Chang TL. The effectiveness of BMI, calf circumference and mid-arm circumference in predicting subsequent mortality risk in elderly Taiwanese. *Br J Nutr* 2011;105:275–281
7. Mason C, Craig CL, Katzmarzyk PT. Influence of central and extremity circumferences on all-cause mortality in men and women. *Obesity (Silver Spring)* 2008;16:2690–2695
8. Debetto S, Leone N, Courbon D, et al. Calf circumference is inversely associated with carotid plaques. *Stroke* 2008;39:2958–2965
9. Esmailzadeh A, Mirmiran P, Azizi F. Waist-to-hip ratio is a better screening measure for cardiovascular risk factors than other anthropometric indicators in Tehranian adult men. *Int J Obes Relat Metab Disord* 2004;28:1325–1332
10. Lu B, Zhou J, Waring ME, Parker DR, Eaton CB. Abdominal obesity and peripheral vascular disease in men and women: a comparison of waist-to-thigh ratio and waist circumference as measures of abdominal obesity. *Atherosclerosis* 2010;208:253–257
11. Li C, Ford ES, Zhao G, Kahn HS, Mokdad AH. Waist-to-thigh ratio and diabetes among US adults: the Third National Health and Nutrition Examination Survey. *Diabetes Res Clin Pract* 2010;89:79–87
12. Després JP, Lemieux I, Prud'homme D. Treatment of obesity: need to focus on high risk abdominally obese patients. *BMJ* 2001;322:716–720
13. Alberti KG, Zimmet P, Shaw J. Metabolic syndrome—a new world-wide definition. A Consensus Statement from the International Diabetes Federation. *Diabet Med* 2006;23:469–480
14. Akinmokin A, Selby PL, Ramaiya K, Alberti KG. The short insulin tolerance test for determination of insulin sensitivity: a comparison with the euglycaemic clamp. *Diabet Med* 1992;9:432–437
15. Dominguez LJ, Barbagallo M. The cardiometabolic syndrome and sarcopenic obesity in older persons. *J Cardiometab Syndr* 2007;2:183–189
16. Stephen WC, Janssen I. Sarcopenic-obesity and cardiovascular disease risk in the elderly. *J Nutr Health Aging* 2009;13:460–466
17. Kim CS, Nam JY, Park JS, et al. The correlation between insulin resistance and the visceral fat to skeletal muscle ratio in middle-aged women. *Yonsei Med J* 2004;45:469–478
18. Lim KI, Yang SJ, Kim TN, et al. The association between the ratio of visceral fat to thigh muscle area and metabolic syndrome: the Korean Sarcopenic Obesity Study (KSOS). *Clin Endocrinol (Oxf)* 2010;73:588–594
19. Mueller WH, Wear ML, Hanis CL, et al. Which measure of body fat distribution is best for epidemiologic research? *Am J Epidemiol* 1991;133:858–869
20. Schneider HJ, Glaesmer H, Klotsche J, et al.; DETECT Study Group. Accuracy of anthropometric indicators of obesity to predict cardiovascular risk. *J Clin Endocrinol Metab* 2007;92:589–594
21. Lemieux I, Drapeau V, Richard D, et al. Waist girth does not predict metabolic complications in severely obese men. *Diabetes Care* 2006;29:1417–1419
22. Kim SK, Park SW, Kim SH, Cha BS, Lee HC, Cho YW. Visceral fat amount is associated with carotid atherosclerosis even in type 2 diabetic men with a normal waist circumference. *Int J Obes (Lond)* 2009;33:131–135
23. Kahn HS, Austin H, Williamson DF, Arensberg D. Simple anthropometric indices associated with ischemic heart disease. *J Clin Epidemiol* 1996;49:1017–1024
24. Rolland Y, Lauwers-Cances V, Cournot M, et al. Sarcopenia, calf circumference, and physical function of elderly women: a cross-sectional study. *J Am Geriatr Soc* 2003;51:1120–1124
